# Supplementary material
Source: ML conference proceedings conference paper supplement (https://openaccess.thecvf.com/content/CVPR2023/html/Sawdayee_OReX_Object_Reconstruction_CVPR_2023_paper.html)
Supplement: Supplementary file 1 [file Sawdayee_OReX_Object_Reconstruction_CVPR_2023_supplemental.pdf]

# OReX: Object Reconstruction from Planar Cross-sections Using Neural Fields

## (Supplementary material)

Haim Sawdayee  
The Blavatnik School of Computer Science  
Tel Aviv University  
haimsawdayee@mail.tau.ac.il

Amir Vaxman  
School of Informatics  
The University of Edinburgh  
avaxman@inf.ed.ac.uk

Amit H. Bermano  
The Blavatnik School of Computer Science  
Tel Aviv University  
amberman@tauex.tau.ac.il

We supplement and expand on details from our main document.

## 1. Implementation details

### 1.1. Sampling and extraction

We train our network for a total of 650 epochs. At the 0, 50, 100, 200, 300, 450 epoch marks, we add new points to the dataset, where we always train on the last three such sets. The points are sampled from these distributions:

1. We compute the convex hull of the object. We then scale it up by 5% and sample 16384 points on it uniformly by selecting faces with probability proportional to area and sampling a point inside it using triangle point picking method.
2. We sample every plane uniformly with 2048 points, within a bounding box that is aligned to the principal axes of the contours.
3. For epoch 0, we initially sample  $n = 2$  points uniformly on every edge, and off-surface points in distance  $\epsilon = 2^{-4}$ . In subsequent epoch marks we add  $n = 2, 3, 3, 4, 5$  and  $\epsilon = 2^{-5}, 2^{-5}, 2^{-6}, 2^{-6}, 2^{-7}$ .

The mesh is extracted by dual-contouring on a grid sampled by inference of  $f(x)$  (both values and gradients), where we use grid resolution  $300^3$ .

### 1.2. Architecture

Our base architecture is a 7-hidden layer MLP of layer width 64. Unlike a typical Neural Field, our MLP is residual, that is it computes an offset from the input, rather than the

absolute values (as seen in Fig. 2 of the main paper). Input coordinates are modulated using *sin* and *cos* Positional Encoding, with 5 learnable frequencies concatenated to the original input.

**Refinement iterations:** We run our prediction 10 times through our network in a recurrent manner, both during training and test time. Except for the OReXNet output, the MLP also produces a small hidden code of size 32 that is passed along the iterations to the network. The first iteration is fed with a learned constant  $C$ .

### 1.3. Training hyperparameters

For all experiments in the paper, we use the hinge loss with  $\lambda = 10^{-4}$  and set the hinge point to be at  $\alpha = 100$ . We trained with initial learning rate  $lr = 10^{-2}$  and reduced it by a factor of  $\gamma = 0.9$  every 10 epochs.

### 1.4. Cross-section placement

The placement and the density of the cross-section planes is a determining factor for resulting quality—in fact, this is the entire challenge, as regions that are not sampled can only be extrapolated, as in Fig 2. To show the robustness of our method, our experiments show three patterns of selected cross-sections: randomly-oriented slices (Elephant, Oil lamp), regularly-spaced axis-aligned planes (Balloondog, Figure eight, Hand ok, Rose), and medically-generated slices (Skull, Hart, Vertebrate, Abdomen).

## 2. Additional experiments

We demonstrate the advantages of using neural fields interpolators, rather than traditional smooth choices (like the mean-value interpolant by [1]). In Fig 1 and Fig 2 the neural

field demonstrates self-similarity that correctly interpolates regions that are not sampled.

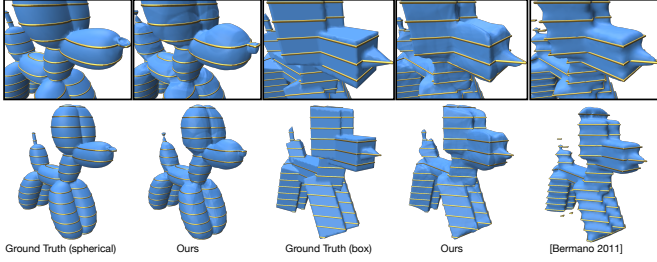

Figure 1. Self-similarities and how OReX leverages them. When the slices sample either a more round shape (left, ‘round dog’) or a cube-like sharp shape (middle ‘box dog’), the interpolation of the nose is consistent with the rest of the style, thanks to the natural self-similarities of the neural field. Methods that use a smoothing prior (e.g., [1], right) fail to capture the sharpness of the model.

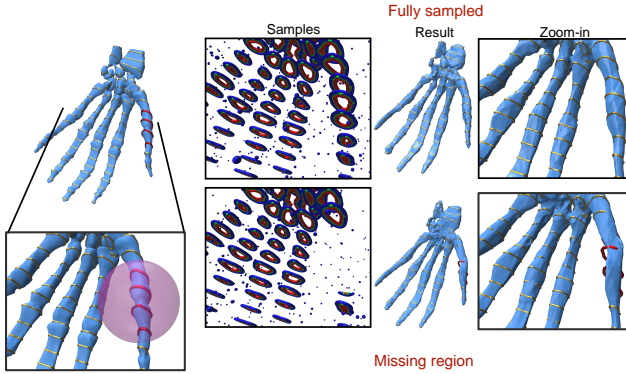

Figure 2. OReX naturally completes regions with missing samples, even as we omit them from the training process (red contours) Top row: the complete reconstruction. Bottom row: samples in the highlighted region are omitted. Everything else is trained as usual. Left to right: Grout Truth mesh, samples used in training, OReX reconstruction, with a zoomed-in view.

### 3. Quantitative comparisons

In Table 1, we expand our quantitative comparisons (Table 1 in the main text). We compare our method to three others: [1] is a method developed specifically for cross-section reconstruction with similar settings. We attempted to run the code for newer methods [3, 7], but could not produce results for or inputs.

In addition, we compare to two point-cloud-based methods [2, 6], using our setting and with additional input information in the form of point normals. We measure performance using both global geometry measures (Hausdorff distance, Champfer Distance, and IoU of the reconstructed volumes), as well as metrics on the input cross-sections themselves (IoU in 2D). In all measures we demonstrate state-of-the-art

results. In Fig 5 we visualized closest-point distances of our method.

### 4. Qualitative comparisons

Below are further visual comparisons with a recent point cloud method (fig. 3) and a concurrent reconstruction method based on slices (fig. 4). Our method produces watertight meshes that smoothly interpolate the input.

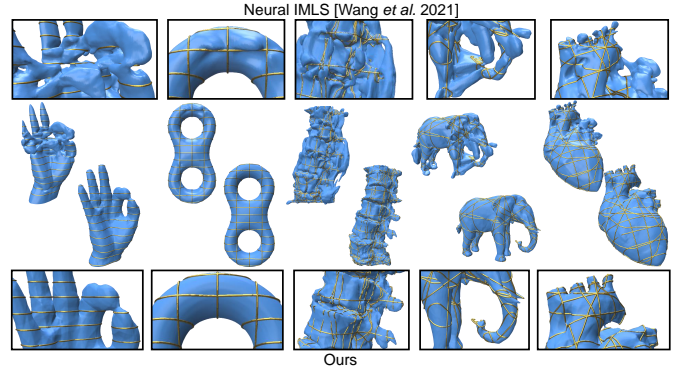

Figure 3. Comparison of OReX (bottom) to a recent point-cloud-based method [5] (top). Point-cloud methods typically expect a dense input covering the whole volume more or less uniformly; hence artifacts appear when feeding cross-sectional input.

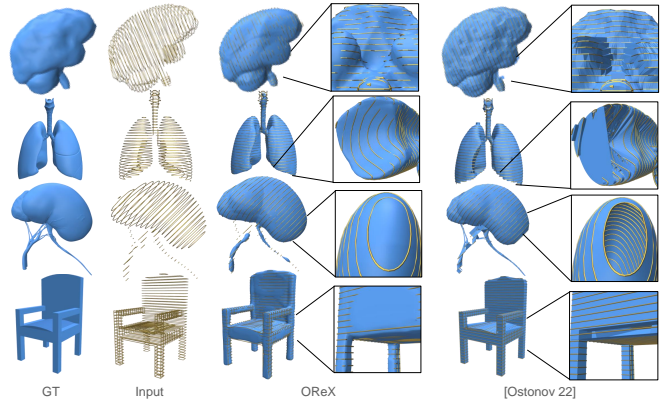

Figure 4. Comparison of OReX to a concurrent work by Ostono [4]. Left to right: ground truth, input slices, our method, and Ostono 22.

### 5. Stats

In Table 2, we report statistics on the inputs we used. Note the complexity of the shape as well as runtimes.

| Input       | Hausdorff distance |                |                             |                          |             | CD           |                |                             |                          |             | IoU in 3d    |                |                             |                          |             | IoU in 2d    |                |                             |                          |             |
|-------------|--------------------|----------------|-----------------------------|--------------------------|-------------|--------------|----------------|-----------------------------|--------------------------|-------------|--------------|----------------|-----------------------------|--------------------------|-------------|--------------|----------------|-----------------------------|--------------------------|-------------|
|             | OReX               | Bermano et. al | point2mesh<br>plane normals | point2mesh<br>GT normals | Neural-IMLS | OReX         | Bermano et. al | point2mesh<br>plane normals | point2mesh<br>GT normals | Neural-IMLS | OReX         | Bermano et. al | point2mesh<br>plane normals | point2mesh<br>GT normals | Neural-IMLS | OReX         | Bermano et. al | point2mesh<br>plane normals | point2mesh<br>GT normals | Neural-IMLS |
| Eight 15    | <b>0.018</b>       | 0.065          | 0.219                       | 0.046                    | 0.237       | <b>0.002</b> | 0.020          | 0.029                       | 0.005                    | 0.035       | <b>0.984</b> | 0.865          | 0.842                       | 0.961                    | 0.680       | <b>0.988</b> | 0.984          | 0.795                       | 0.980                    | **          |
| Eight 20    | <b>0.006</b>       | 0.033          | 0.045                       | 0.014                    | 0.052       | <b>0.002</b> | 0.016          | 0.013                       | 0.004                    | 0.004       | <b>0.987</b> | 0.893          | 0.915                       | 0.974                    | 0.971       | <b>0.986</b> | 0.976          | 0.961                       | 0.971                    | 0.975       |
| Elephant    | <b>0.056</b>       | 0.081          | 0.100                       | 0.086                    | 0.312       | <b>0.006</b> | 0.015          | 0.018                       | 0.010                    | 0.031       | <b>0.966</b> | 0.908          | 0.885                       | 0.935                    | 0.803       | <b>0.975</b> | 0.969          | 0.850                       | 0.908                    | **          |
| Balloon dog | <b>0.049</b>       | 0.194          | 0.078                       | 0.086                    | 0.264       | <b>0.006</b> | 0.021          | 0.015                       | 0.010                    | 0.044       | <b>0.957</b> | 0.868          | 0.897                       | 0.928                    | 0.659       | <b>0.988</b> | 0.977          | 0.926                       | 0.956                    | **          |
| hand ok     | <b>0.063</b>       | 0.177          | 0.195                       | 0.135                    | 0.207       | <b>0.008</b> | 0.024          | 0.015                       | 0.013                    | 0.040       | <b>0.955</b> | 0.860          | 0.921                       | 0.931                    | 0.707       | <b>0.987</b> | 0.968          | 0.908                       | 0.882                    | 0.765       |
| Armadillo   | <b>0.050</b>       | 0.121          | 0.057                       | 0.059                    | 0.827       | <b>0.009</b> | 0.017          | 0.016                       | 0.011                    | 0.212       | <b>0.939</b> | 0.891          | 0.891                       | 0.921                    | *           | <b>0.964</b> | 0.776          | 0.850                       | 0.868                    | *           |

Table 1. Quantitative comparisons. We measure performance using the global metrics Hausdorff distance, Champfer Distance, and Intersection over Union (IoU) of the inner volume compared to the GT shape. In addition, we measure fidelity performance by reporting IoU of the “inside” regions on the input cross-sections. We compare our result to a dedicated cross-section-based reconstruction method [1], to two flavors of a point-cloud reconstruction method [2], and another recent point-cloud based method [6].

| Input        | #slices | #edges | #samples (last set) | Training time (h) | Meshing time (h) |
|--------------|---------|--------|---------------------|-------------------|------------------|
| Armadillo    | 26      | 11039  | 290412              | 2.90              | 0.22             |
| Balloon dog  | 15      | 4579   | 138684              | 1.51              | 0.22             |
| Eight (S)    | 15      | 2028   | 87664               | 1.06              | 0.22             |
| Eight (M)    | 20      | 3178   | 120904              | 1.40              | 0.21             |
| Elephant     | 24      | 10429  | 274116              | 2.75              | 0.23             |
| Hand OK      | 15      | 4082   | 128744              | 1.42              | 0.22             |
| Oil lamp     | 34      | 17387  | 433756              | 4.13              | 0.22             |
| Abdomen      | 42      | 53448  | 1067530             | 10.62             | 0.23             |
| Heart        | 25      | 4534   | 158264              | 1.77              | 0.23             |
| Horse        | 29      | 4101   | 157796              | 1.83              | 0.23             |
| Twisted rose | 15      | 9000   | 227104              | 2.26              | 0.27             |
| Skull        | 16      | 8821   | 225572              | 2.31              | 0.33             |
| Vertebrae    | 36      | 14844  | 386847              | 4.22              | 0.24             |

Table 2. Summary of our model zoo statistics. We report the number of planar cross-sections (#slices), contour complexity (i.e., the total number of edges of the slices) (#edges), the number of points sampled on the last set, closest to the contour (#samples), training time (in hours), and time to extract the mesh after training (meshing time, in hours)

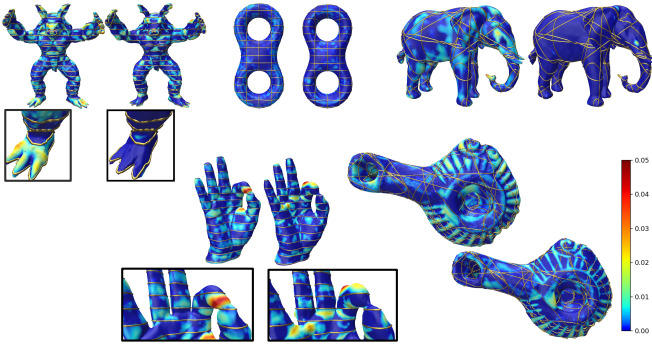

Figure 5. Closest-point distances from the ground truth (left meshes) to our reconstruction, and vice versa (right meshes). Scale is relative to the bounding-box diagonal.

## References

- [1] Amit Bermano, Amir Vaxman, and Craig Gotsman. Online reconstruction of 3d objects from arbitrary cross-sections. *ACM Transactions on Graphics (TOG)*, 30(5):1–11, 2011. 1, 2, 3
- [2] Rana Hanocka, Gal Metzer, Raja Giryes, and Daniel Cohen-Or. Point2mesh: A self-prior for deformable meshes. *arXiv preprint arXiv:2005.11084*, 2020. 2, 3
- [3] Zhiyang Huang, Ming Zou, Nathan Carr, and Tao Ju. Topology-controlled reconstruction of multi-labelled domains from cross-sections. *ACM Transactions on Graphics (TOG)*, 36(4):1–12, 2017. 2
- [4] Azimkhon Ostionov. Cut-and-approximate: 3d shape reconstruction from planar cross-sections with deep reinforcement learning. *arXiv preprint arXiv:2210.12509*, 2022. 2
- [5] Zixiong Wang, Pengfei Wang, Qiuji Dong, Junjie Gao, Shuang-Min Chen, Shiqing Xin, and Changhe Tu. Neural-impls: Learning implicit moving least-squares for surface reconstruction from unoriented point clouds. *CoRR*, abs/2109.04398, 2021. 2
- [6] Zixiong Wang, Pengfei Wang, Pengshuai Wang, Qiuji Dong, Junjie Gao, Shuangmin Chen, Shiqing Xin, Changhe Tu, and Wenping Wang. Neural-impls: Self-supervised implicit moving least-squares network for surface reconstruction, 2022. 2, 3
- [7] Ming Zou, Michelle Holloway, Nathan Carr, and Tao Ju. Topology-constrained surface reconstruction from cross-sections. *ACM Transactions on Graphics (TOG)*, 34(4):1–10, 2015. 2
